# Supplementary material
Source: PubMed Central journal article supplement (PMC7097549)
Supplement: 13206_2019_3404_MOESM1_ESM.pdf [file 13206_2019_3404_MOESM1_ESM.pdf]

**Supplementary Table 1.** The target sequences for amplification.

| Target gene | Sequence                                                                                                                                                                                                                                                                                                                                                                                                                                                                                                                                                                                                                                                | Length (bp) |
|-------------|---------------------------------------------------------------------------------------------------------------------------------------------------------------------------------------------------------------------------------------------------------------------------------------------------------------------------------------------------------------------------------------------------------------------------------------------------------------------------------------------------------------------------------------------------------------------------------------------------------------------------------------------------------|-------------|
| ORF1b       | TACAAGCAGAAAATGTAAGTGGACTTTTTAAGGACTGTAGTAAGATCATTACTGGTCTTC<br>ATCCTACACAGGCACCTACACACCTCAGCGTTGATATAAAGTTCAAGACTGAAGGATTAT<br>GTGTTGACATACCAGGCATACCAAAGGACATGACCTACCGTAGACTCATCTCTATGATGG<br>GTTTCAAAATGAATTACCAAGTCAATGGTTACCCTAATATGTTTATCACCCGGAAGAAG<br>CTATTTCGTCACGTTTCGTGCGTGGATTGGCTTTGATGTAGAGGGCTGTCATGCAACTAGAG<br>ATGCTGTGGGTAACCTACTCTCCAGCTAGGATTTCTACAGGTGTTAACTTAGTAG<br>CTGTACCGACTGGTTATGTTGACTGAAAATAACACAGAATTCACCAGAGTTAATGCAA<br>AACCTCCACCAGGTGACCAGTTAAACATCTTATACCAC                                                                                                                                                        | 459         |
| N           | ATGTCTGATAATGGACCCCAATCAAACCAACGTAGTGCCCCCGCATTACATTTGGTGGGA<br>CCCACAGATTTCAACTGACAATAACCAGAATGGAGGACGCAATGGGGCAAGGCCAAAACAG<br>CGCCGACCCCAAGGTTTACCAATAATACTGCGTCTTGGTTCACAGCTCTCACTCAGCAT<br>GGCAAGGAGGAACTTAGATTCCCTCGAGGCCAGGGCGTTCCAATCAACACCAATAGTGGT<br>CCAGATGACCAAATTGGCTACTACCGAAGAGCTACCCGACGAGTTCGTGGTGGTGACGGC<br>AAAATGAAAGAGCTCAGCCCCAGATGGTACTTCTATTACCTAGGAACTGGCCAGAAGCT<br>TCACTTCCCTACGGCGCTAACAAAAGAAGGCATCGTATGGGTTGCAACTGAGGGAGCCTTG<br>AATACACCCAAAGACCACATTGGCACCCGAATCCTAATAACAATGCTGCCACCGTGCTA<br>CAACTTCTCAAGGAACAACATTGCCAAAAGGCTTCTACGCAGAGGGAAGCAGAGGGCGGC<br>AGTCAAGCCTCTTCTCGTCTCTATCAGTAGTCGCGTAATTCAAGAAATTCAACTCT | 600         |

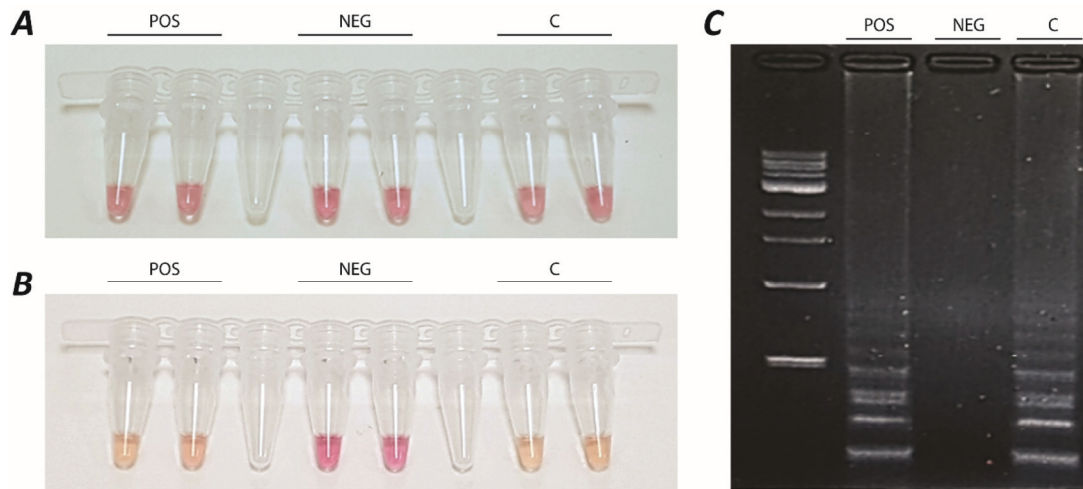

**Supplementary Figure 1S.** Color change in LAMP Assay. Primer set II (six primers) for N genes was used for amplification. A, Before amplification; B, After amplification. An orange color indicates a positive and a neutral pink color indicates a negative reaction. C, Gel electrophoresis of LAMP products (POS: positive; NEG: negative; C: control).

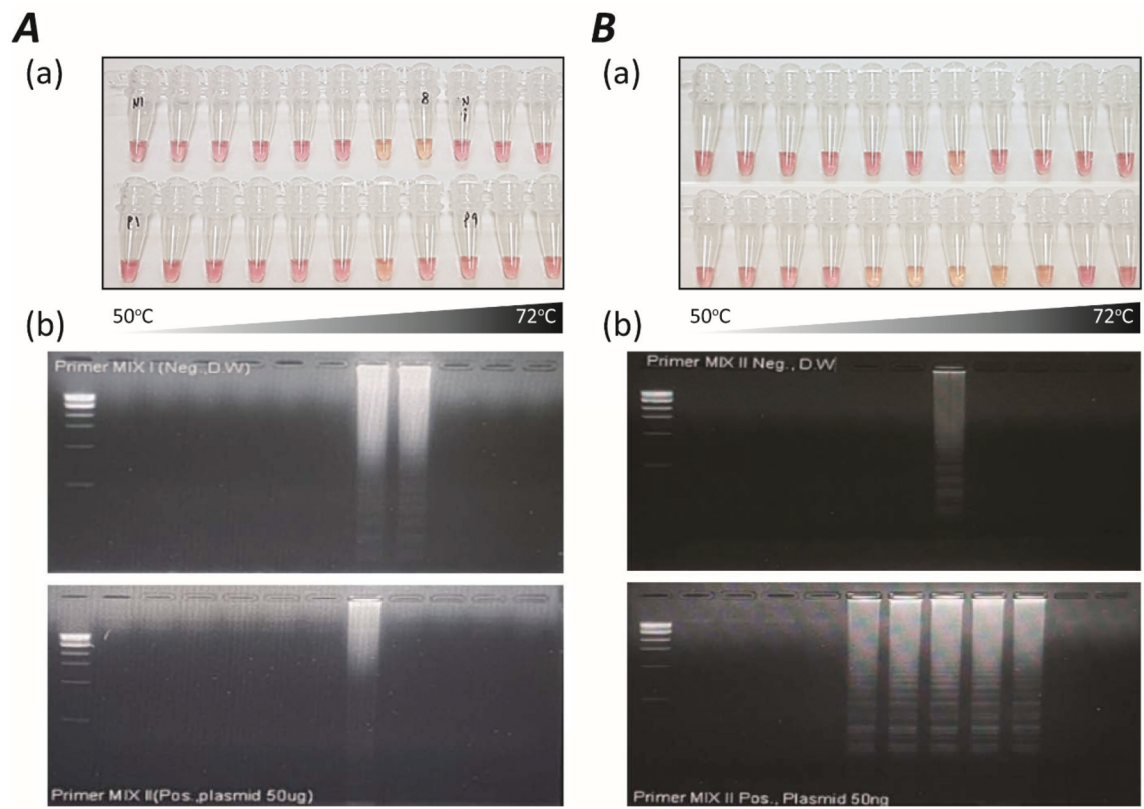

**Supplementary Figure 2S.** LAMP primer set optimization with two LAMP primer set. A, four primers (F3, B3, FIP, BIP); and B, six primers (added Loop F and Loop B primers to A primer set). Detection of LAMP products by (a) naked eye with color change and (b) agarose gel electrophoresis (Top: negative control (non-template control, NTC); Bottom: positive control with 50 ng of genomic DNA). An orange color indicates a positive and a neutral pink color indicates a negative reaction. (b) Agarose electrophoresis results of LAMP assay (temperature gradient from 50°C (lane 2) to 72°C (lane 12), 1kb DNA ladder; lane 1). Optimal temperature was determined to be 65°C for both targets.
